# Supplementary material for: COVID-19 Point-of-Care Diagnostics That Satisfy Global Target Product Profiles
Source: Diagnostics (Basel). 2021 Jan 12;11(1):115. doi: 10.3390/diagnostics11010115 (PMC7828180; doi:10.3390/diagnostics11010115)
Supplement: Supplementary file 1 [file diagnostics-11-00115-s001.pdf]

| World Health Organization v.1.0             |                                                                                                                                                                                                                                                                                           | FDA EUA Selected Direct (antigen/RNA) POCT (performance based on manufacturer's claims)                                       |                                                                                                                                                                       |                                                                                                                             |                                                                                                                                                                     |                                                                         |                                                                                                               |                                                                                                                           | ed Direct (antigen/RNA) POCT (performance based on independent                    |                                                                           |                                                                                                                             |                                                                                             |
|---------------------------------------------|-------------------------------------------------------------------------------------------------------------------------------------------------------------------------------------------------------------------------------------------------------------------------------------------|-------------------------------------------------------------------------------------------------------------------------------|-----------------------------------------------------------------------------------------------------------------------------------------------------------------------|-----------------------------------------------------------------------------------------------------------------------------|---------------------------------------------------------------------------------------------------------------------------------------------------------------------|-------------------------------------------------------------------------|---------------------------------------------------------------------------------------------------------------|---------------------------------------------------------------------------------------------------------------------------|-----------------------------------------------------------------------------------|---------------------------------------------------------------------------|-----------------------------------------------------------------------------------------------------------------------------|---------------------------------------------------------------------------------------------|
|                                             | Acceptable                                                                                                                                                                                                                                                                                | Desirable                                                                                                                     | BinaxNOW COVID-19 Ag Card                                                                                                                                             | Sofia 2 Flu+SARS Antigen FIA                                                                                                | Luminex SARS-CoV2 Ag Test                                                                                                                                           | COVID-19 Home Test                                                      | MobileDetect Bio BC19 Test (RT-LAMP)                                                                          | AQ-TOP Plus COVID-19 Rapid Test (RT-LAMP)                                                                                 | SARS-CoV-2 Detecter Test (RT-LAMP)                                                | Bioeasy Diagnostic Kit - COVID-19 Ag Test                                 | Sofia 2 Antigen FIA                                                                                                         | Standard QCOVID-19 Ag FIA                                                                   |
| Manufacturer                                |                                                                                                                                                                                                                                                                                           |                                                                                                                               | Abbott                                                                                                                                                                | Quidel Corporation                                                                                                          | Luminex                                                                                                                                                             | Elume                                                                   | DetectsChem Inc.                                                                                              | SEASUN BIOMATERIALS, Inc.                                                                                                 | Mammoth Biosciences, Inc.                                                         | Shenzhen Bioeasy Biotechnology Co., Ltd.                                  | Quidel Corporation                                                                                                          | SD Biosensor, INC.                                                                          |
| Country                                     |                                                                                                                                                                                                                                                                                           |                                                                                                                               | USA                                                                                                                                                                   | USA                                                                                                                         | UK / USA                                                                                                                                                            | Australia                                                               | USA                                                                                                           | Korea                                                                                                                     | USA                                                                               | China                                                                     | USA                                                                                                                         | Korea                                                                                       |
| URL                                         |                                                                                                                                                                                                                                                                                           |                                                                                                                               | <a href="https://dem.abbott.com/en-us/homepage/coronavirus/fluand-sars-cov2-flu-card">https://dem.abbott.com/en-us/homepage/coronavirus/fluand-sars-cov2-flu-card</a> | <a href="https://www.quidel.com/mmnausa/s2-flu-sars-antigen-fia">https://www.quidel.com/mmnausa/s2-flu-sars-antigen-fia</a> | <a href="https://www.luminex.com/us-en/what-we-do/diagnostics/point-of-care-testing">https://www.luminex.com/us-en/what-we-do/diagnostics/point-of-care-testing</a> | <a href="https://www.elumehome.com">https://www.elumehome.com</a>       | <a href="https://www.detectschem.com/html5/products.html">https://www.detectschem.com/html5/products.html</a> | <a href="http://www.seasunbiomaterials.com/html5/products.html">http://www.seasunbiomaterials.com/html5/products.html</a> | <a href="https://www.mammothbio.com/covid/">https://www.mammothbio.com/covid/</a> | <a href="http://en.bioeasy.com/?p=1038">http://en.bioeasy.com/?p=1038</a> | <a href="https://www.quidel.com/mmnausa/s2-flu-sars-antigen-fia">https://www.quidel.com/mmnausa/s2-flu-sars-antigen-fia</a> | <a href="http://idbiosensor.com/pe/product/7673">http://idbiosensor.com/pe/product/7673</a> |
| Intended Use                                | 1) In areas with confirmed SARS-CoV-2 community wide transmission or confirmed outbreaks in closed or semi-closed communities and in high risk groups; 2) Suspected SARS-CoV-2 outbreak situations; 3) Monitor trends in disease incidence                                                |                                                                                                                               | Qualitative detection of SARS-CoV-2 antigen in patient care setting; POCT                                                                                             | Qualitative detection of SARS-CoV-2 antigen in patient care setting; POCT                                                   | Qualitative detection of SARS-CoV-2 antigen in patient care setting; POCT                                                                                           | Qualitative detection of SARS-CoV-2 antigen; non-prescription home use  | Qualitative detection of SARS-CoV-2 RNA                                                                       | Qualitative detection of SARS-CoV-2 RNA                                                                                   | Qualitative detection of SARS-CoV-2 RNA                                           | Qualitative detection of SARS-CoV-2 in patient care setting; POCT         | Qualitative detection of SARS-CoV-2 in patient care setting; POCT                                                           | Qualitative detection of SARS-CoV-2 in patient care setting; POCT                           |
| Target Population / patient                 | patients with respiratory symptoms or fewer or other symptoms (diarrhea, pneumonia) and either a known contact with a confirmed or probable COVID-19 patient OR living in an area of cluster OR community transmission, and close contact of index patients (confirmed COVID-19 patients) |                                                                                                                               | Individuals suspected of COVID-19 within 7 days of symptom onset                                                                                                      | Individuals suspected of COVID-19 within 5 days of symptom onset                                                            | Individuals suspected of COVID-19 within 12 days of symptom onset                                                                                                   | Individuals suspected of COVID-19                                       | Individual suspected of COVID-19                                                                              | Individual suspected of COVID-19                                                                                          | Individual suspected of COVID-19                                                  | Individual suspected of COVID-19                                          | Individuals suspected of COVID-19 within 5 days of symptom onset                                                            | post                                                                                        |
| Intended laboratory setting                 | outside laboratories including routine screening points of health care facilities by health care workers or lab techs with appropriate training to use the test.                                                                                                                          | same as acceptable but can be self-administered and/or performed by trained lab workers (volunteer, community health workers) | patient care setting; CLIA certified labs                                                                                                                             | patient care setting; CLIA certified labs                                                                                   | patient care setting; CLIA certified labs                                                                                                                           | non-prescription home use                                               | certified laboratories                                                                                        | certified laboratories                                                                                                    | certified laboratories                                                            | not specified (patient care setting / labs)                               | patient care setting; CLIA certified labs                                                                                   | not specified (patient care setting / labs)                                                 |
| Target molecule                             | SARS-CoV biomarker (RNA, antigen) specific for acute (first week after onset of symptoms/current infection)                                                                                                                                                                               | SARS-CoV-2 only biomarker specific for acute and subacute (3hr-2 weeks after onset of symptoms/current infection)             | SARS-CoV-2 nucleocapsid protein (and SARS-CoV)                                                                                                                        | SARS-CoV-2 nucleocapsid protein                                                                                             | SARS-CoV-2 nucleocapsid protein                                                                                                                                     | SARS-CoV-2 & SARS-CoV nucleocapsid protein                              | SARS-CoV-2 N and E genes                                                                                      | SARS-CoV-2 ORF1ab and N genes                                                                                             | SARS-CoV-2 N genes                                                                |                                                                           | SARS-CoV-2 nucleocapsid protein                                                                                             | SARS-CoV-2 nucleocapsid protein                                                             |
| Analytical sensitivity / LOD                | ~10 <sup>3</sup> genomic copies/ml                                                                                                                                                                                                                                                        | ~10 <sup>3</sup> genomic copies/ml                                                                                            | 22.5 TCID <sub>50</sub> /swab (1:125 TCID <sub>50</sub> /ml)                                                                                                          | 32 TCID <sub>50</sub> /ml                                                                                                   | 32 TCID <sub>50</sub> /ml                                                                                                                                           | 6310 TCID <sub>50</sub> /ml                                             | 75 copies/μl                                                                                                  | 1 copies/μl                                                                                                               | 20 copies/μl                                                                      | n/a                                                                       | 113 TCID <sub>50</sub> /ml                                                                                                  | 494.5 TCID <sub>50</sub> /ml                                                                |
| Analytical specificity                      | detects all SARS-CoV-2 viral strains and does not cross react with other human coronaviruses (except SARS-CoV-1) or any other common diseases with similar symptoms (Influenza A, B, RSV, malaria, dengue)                                                                                | detects all SARS-CoV-2 viral strains and does not cross react with other human CoV or common diseases with similar symptoms   | no cross-reactivity in a panel of high prevalence respiratory pathogens                                                                                               | no cross-reactivity in a panel of high prevalence respiratory pathogens                                                     | no cross-reactivity in a panel of high prevalence respiratory pathogens                                                                                             | no cross-reactivity in a panel of high prevalence respiratory pathogens | no cross-reactivity in a panel of high prevalence respiratory pathogens                                       | no cross-reactivity in a panel of high prevalence respiratory pathogens                                                   | no cross-reactivity in a panel of high prevalence respiratory pathogens           | n/a                                                                       | no cross-reactivity in a panel of high prevalence respiratory pathogens                                                     | n/a                                                                                         |
| Sensitivity (or PPV)                        | 2.80%                                                                                                                                                                                                                                                                                     | 2.90%                                                                                                                         | 97.1% (85.1 - 99.9)                                                                                                                                                   | 96.7% (83.3-99.4)                                                                                                           | 97.6% (91.4-99.3)                                                                                                                                                   | 95% (82-99)                                                             | 97.7% (88-100)                                                                                                | 100% (91-100)                                                                                                             | 95% (83.5-98.4)                                                                   | 93.9% (86.5-97.4)                                                         | 93.8% (79.2-99.2)                                                                                                           | 90.6% (75-98)                                                                               |
| Specificity (or NPV)                        | 0.97%                                                                                                                                                                                                                                                                                     | 0.99%                                                                                                                         | 98.5% (92.0-100)                                                                                                                                                      | 100% (97.8-100)                                                                                                             | 96.6% (92.7-98.4)                                                                                                                                                   | 97% (93-99)                                                             | 100% (94.3-100)                                                                                               | 100% (94.2-100)                                                                                                           | 100% (93.2-100)                                                                   | 96.9% (83.8-99.9)                                                         | 96.9% (83.8-99.9)                                                                                                           | 96.9% (83.8-99.9)                                                                           |
| Type of analysis                            | qualitative (yes/no), semi-quantitative, or quantitative                                                                                                                                                                                                                                  | N/A                                                                                                                           | lateral flow immunoassay                                                                                                                                              | lateral flow immunofluorescent                                                                                              | lateral flow immunofluorescence                                                                                                                                     | lateral flow immunofluorescent                                          | RT-LAMP                                                                                                       | RT-LAMP                                                                                                                   | CRISPR-based RT-LAMP                                                              | fluorescent immunochromatographic, double antibody sandwich rxn           | lateral flow immunofluorescent                                                                                              | fluorescent immunoassay                                                                     |
| Interpretation                              | visual manual and/or hardware reader (proprietary or smart phone)                                                                                                                                                                                                                         | visual manual read or digital readout via smartphone app reader with connectivity                                             | visual manual read                                                                                                                                                    | digital readout                                                                                                             | digital readout                                                                                                                                                     | digital readout (smartphone)                                            | visual color recognition                                                                                      | digital readout                                                                                                           | digital readout                                                                   | digital reader, fluorescence analyzer                                     | digital readout                                                                                                             | digital readout                                                                             |
| Sample type                                 | nasopharyngeal, oropharyngeal, nasal swab, nasal wash, sputum                                                                                                                                                                                                                             | nasal swab                                                                                                                    | nasal swab                                                                                                                                                            | nasal swab                                                                                                                  | nasal swab                                                                                                                                                          | nasal swab                                                              | nasal swab                                                                                                    | nasal swab; BAL                                                                                                           | nasal swab / wash                                                                 | nasal swab                                                                | nasal swab                                                                                                                  | nasal swab                                                                                  |
| Sample collection device                    | compatible with an existing swab material                                                                                                                                                                                                                                                 | compatible with multiple swab materials (self-collection or no swab e.g. saline)                                              | swabs in the kit ONLY                                                                                                                                                 | swabs in the kit ONLY                                                                                                       | recommended swab (not included)                                                                                                                                     | swabs in the kit ONLY                                                   | recommended swab (not included)                                                                               | recommended swab (not included)                                                                                           | recommended swab (not included)                                                   | not provided                                                              | swabs in the kit ONLY                                                                                                       | swab provided in kit                                                                        |
| End use profile                             | trained staff in health care facilities                                                                                                                                                                                                                                                   | trained staff or community level (lay person) or self-administered                                                            | medical professional or trained staff in certified patient care setting                                                                                               | trained clinical laboratory personnel and individuals trained in point of care settings                                     | trained clinical laboratory personnel and individuals trained in point of care settings                                                                             | home use                                                                | trained lab personnel                                                                                         | trained lab personnel                                                                                                     | trained lab personnel                                                             | trained medical / lab operator                                            | trained clinical laboratory personnel and individuals trained in point of care settings                                     | professional use                                                                            |
| Training needs                              | 0.5 days with instructions for use and quick reference guide(s)                                                                                                                                                                                                                           | 2hr with instructions, quick reference guide including smart phone app(s)                                                     | N/A (procedure card included)                                                                                                                                         | N/A                                                                                                                         | N/A                                                                                                                                                                 | no                                                                      | Yes                                                                                                           | Yes                                                                                                                       | Yes                                                                               | n/a                                                                       | N/A                                                                                                                         | n/a                                                                                         |
| Sample preparation steps                    | 1                                                                                                                                                                                                                                                                                         | 0                                                                                                                             | 1                                                                                                                                                                     | 1                                                                                                                           | 1                                                                                                                                                                   | 1                                                                       | 1                                                                                                             | 1                                                                                                                         | 1                                                                                 | 1                                                                         | 1                                                                                                                           | 1                                                                                           |
| Reagents/reconstitution                     | very simple reconstitution                                                                                                                                                                                                                                                                | ready to use                                                                                                                  | ready to use                                                                                                                                                          | ready to use                                                                                                                | ready to use                                                                                                                                                        | ready to use                                                            | ready to use                                                                                                  | ready to use                                                                                                              | ready to use                                                                      | ready to use                                                              | ready to use                                                                                                                | ready to use                                                                                |
| Sample min volume                           | single swab and minimal extraction buffer/diluent                                                                                                                                                                                                                                         | single swab + extraction buffer                                                                                               | single swab + extraction buffer                                                                                                                                       | single swab + extraction buffer                                                                                             | single swab + extraction buffer                                                                                                                                     | single swab + extraction buffer                                         | single swab + extraction buffer                                                                               | single swab + extraction buffer                                                                                           | single swab + extraction buffer                                                   | single swab + extraction buffer                                           | single swab + extraction buffer                                                                                             | single swab + extraction buffer                                                             |
| Need to transfer a precise volume of sample | autofill or graduated volume markings on sample transfer device                                                                                                                                                                                                                           | no, or limited to a number of drops                                                                                           | no, few drops                                                                                                                                                         | no, few drops                                                                                                               | no, few drops                                                                                                                                                       | no, few drops                                                           | no, few drops                                                                                                 | no, few drops                                                                                                             | no, few drops                                                                     | no, few drops                                                             | no, few drops                                                                                                               | no, few drops                                                                               |
| Number of timed steps                       | ≤3                                                                                                                                                                                                                                                                                        | 1, with the potential for digitally guided workflows and built-in timers to reduce user errors on timed steps                 | 1                                                                                                                                                                     | 1                                                                                                                           | 1                                                                                                                                                                   | 1                                                                       | 1                                                                                                             | 2                                                                                                                         | 2                                                                                 | 2                                                                         | 1                                                                                                                           | 1                                                                                           |

Table S2: Selected Indirect POCT (antibody) - WHO TPP Criteria

[illegible]
